# Supplementary material
Source: PubMed Central journal article supplement (PMC2442325)
Supplement: M800184200_1.pdf [file M800184200_1.pdf]

**Figure 1S. Side and forward light scatter analysis of hMSCs from a monolayer, one (SPH1), two (SPH2) and three (SPH3) day old spheroids.** Representative dot plots for forward and side light scatters for hMSCs, SPH1, SPH2 and SPH3 are shown in panel A. Overlays of representative histograms of forward light scatter for hMSCs from a monolayer (black), SPH1 (green), SPH2 (red) and SPH3 (blue) are shown in panel B. Overlays of representative histograms of side light scatter for hMSCs from a monolayer (black), SPH1 (green), SPH2 (red) and SPH3 (blue) are shown in panel C. Data in parentheses represent a mean of 4-7 measurements  $\pm$  SD. Statistically significant changes (p-value < .01) compared with hMSCs are denoted with asterisks.

**Figure 2S. Effects of trypsinization on the expression of cell surface markers by hMSCs.** Cells were grown in monolayer, treated with trypsin-EDTA for 5, 30 and 90 min, labeled with FITC- or PE-conjugated monoclonal antibodies specific for proteins indicated in each histogram and analyzed by flow cytometry. Grey filled histograms correspond to hMSCs trypsinized for 5 min. Thin and thick black line histograms represent hMSCs that were trypsinized for 30 and 90 minutes, respectively. Solid black histograms represent isotype controls.

**Figure 3S. Comparison of cell surface marker expression by hMSCs and 3 day old hMSC spheroid cells.** Cells were isolated by trypsinization for 90 min, labeled with FITC- or PE-conjugated monoclonal antibodies and analyzed by flow cytometry. Black and grey filled histograms represent cell from a monolayer of hMSCs and the spheroids, respectively.

**Figure 4S. Expression of CD34, CD184, CD49b and CD49d by hMSCs from a monolayer and one, two and three day old hMSC spheroids.** Cells were dissociated from a monolayer (hMSCs), one (SPH1), two (SPH2) or three (SPH3) day old hMSC spheroids and stained with CD34-FITC – CD184-PE and CD49b-FITC – CD49d-PE pairs of antibodies. Representative two-color fluorescence dot plots and corresponding isotype controls are shown.

Number

A

hMSCs

SPH1

SPH2

SPH3

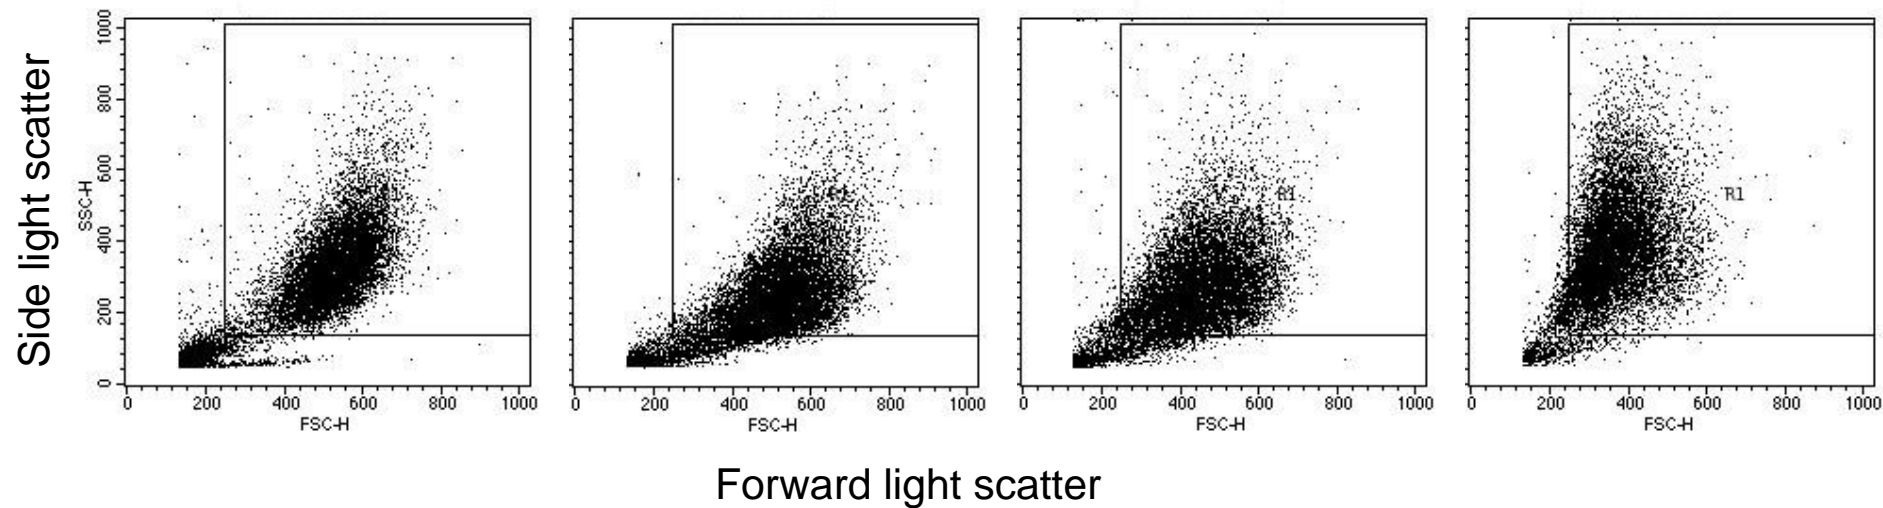

B

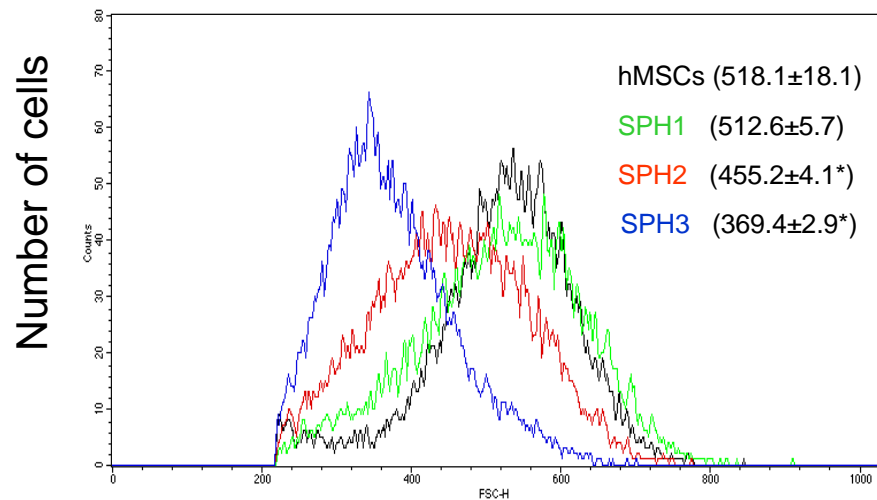

C

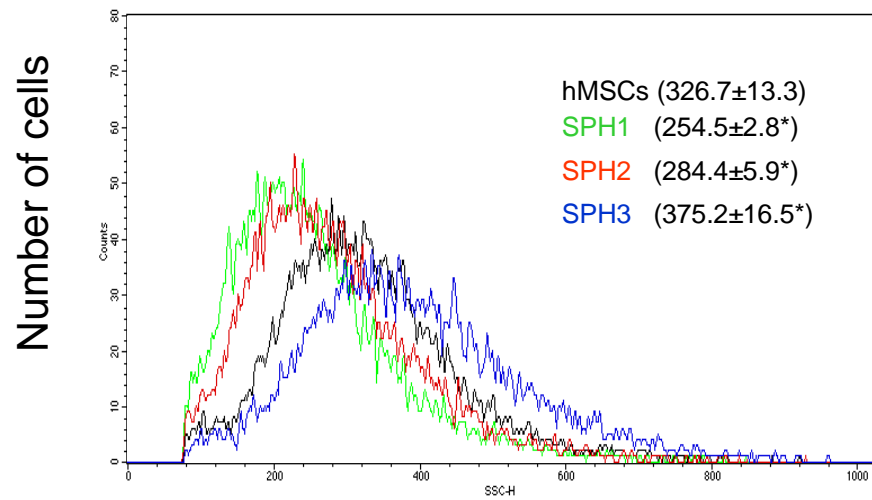

Fig. S1ABC

Relative cell number

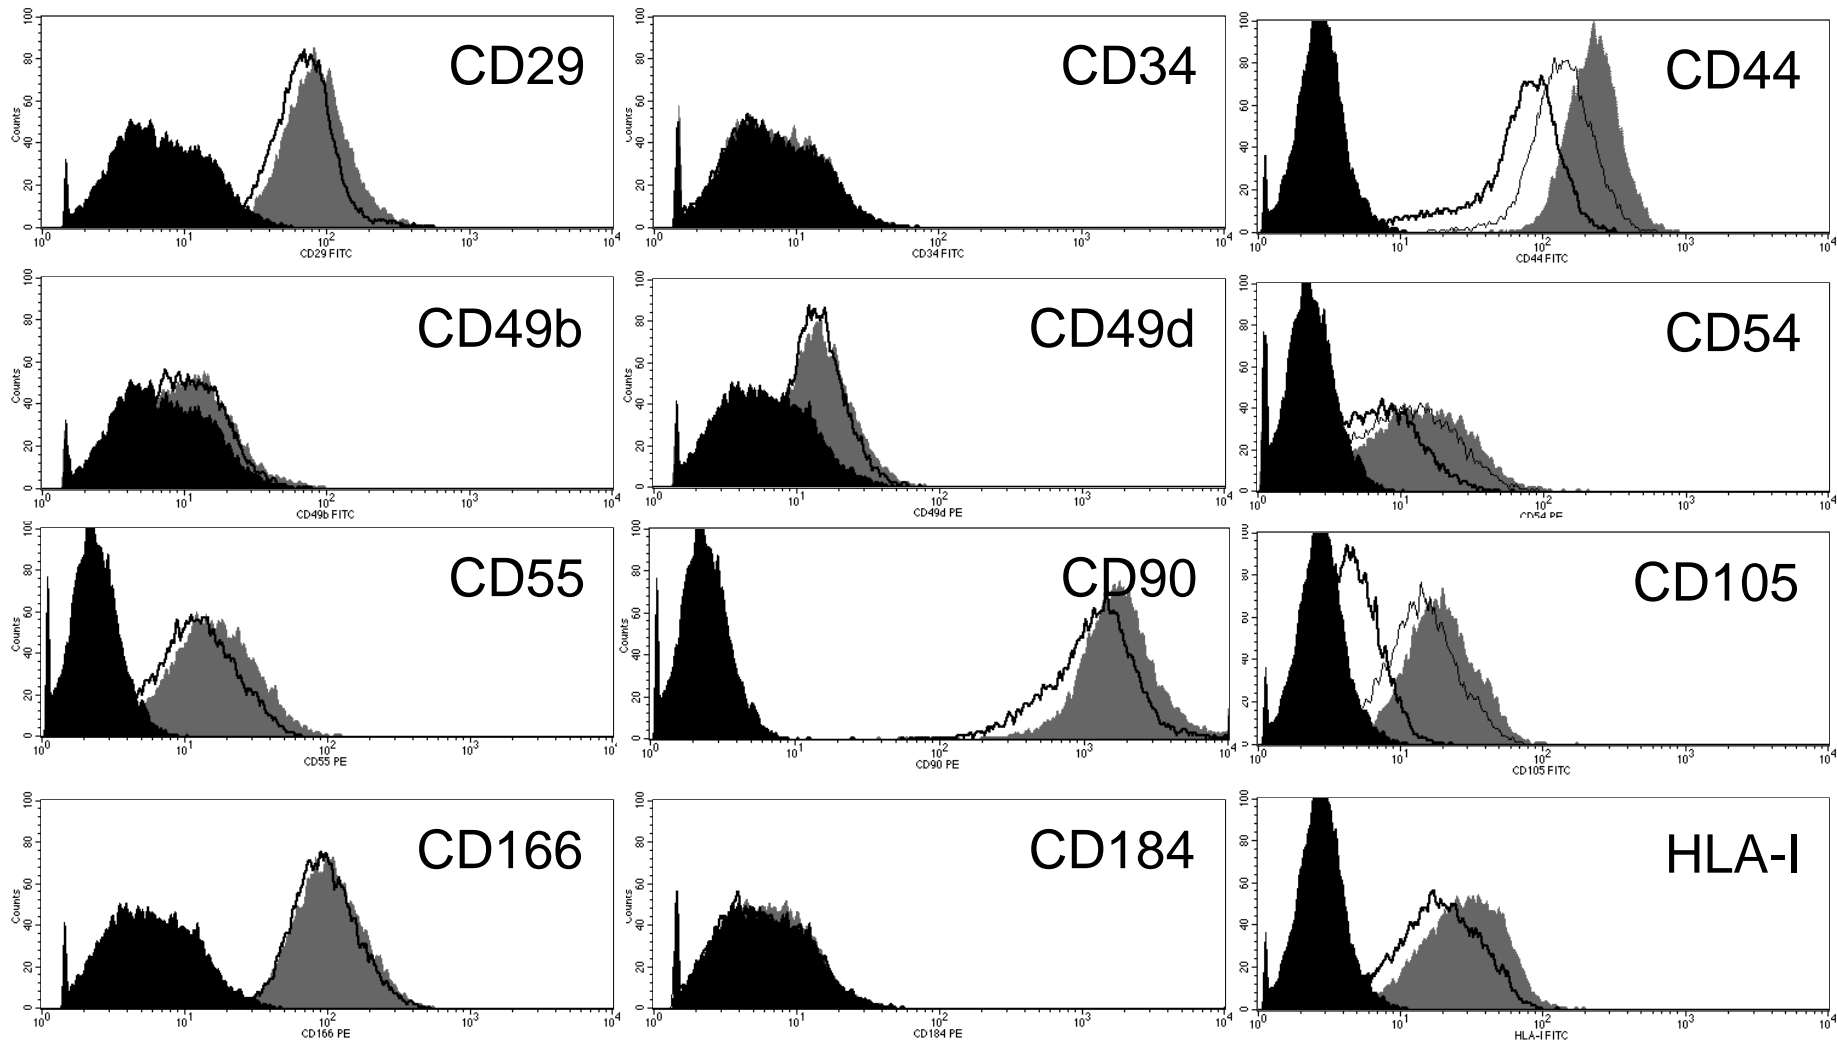

Fluorescence Intensity

Relative cell number

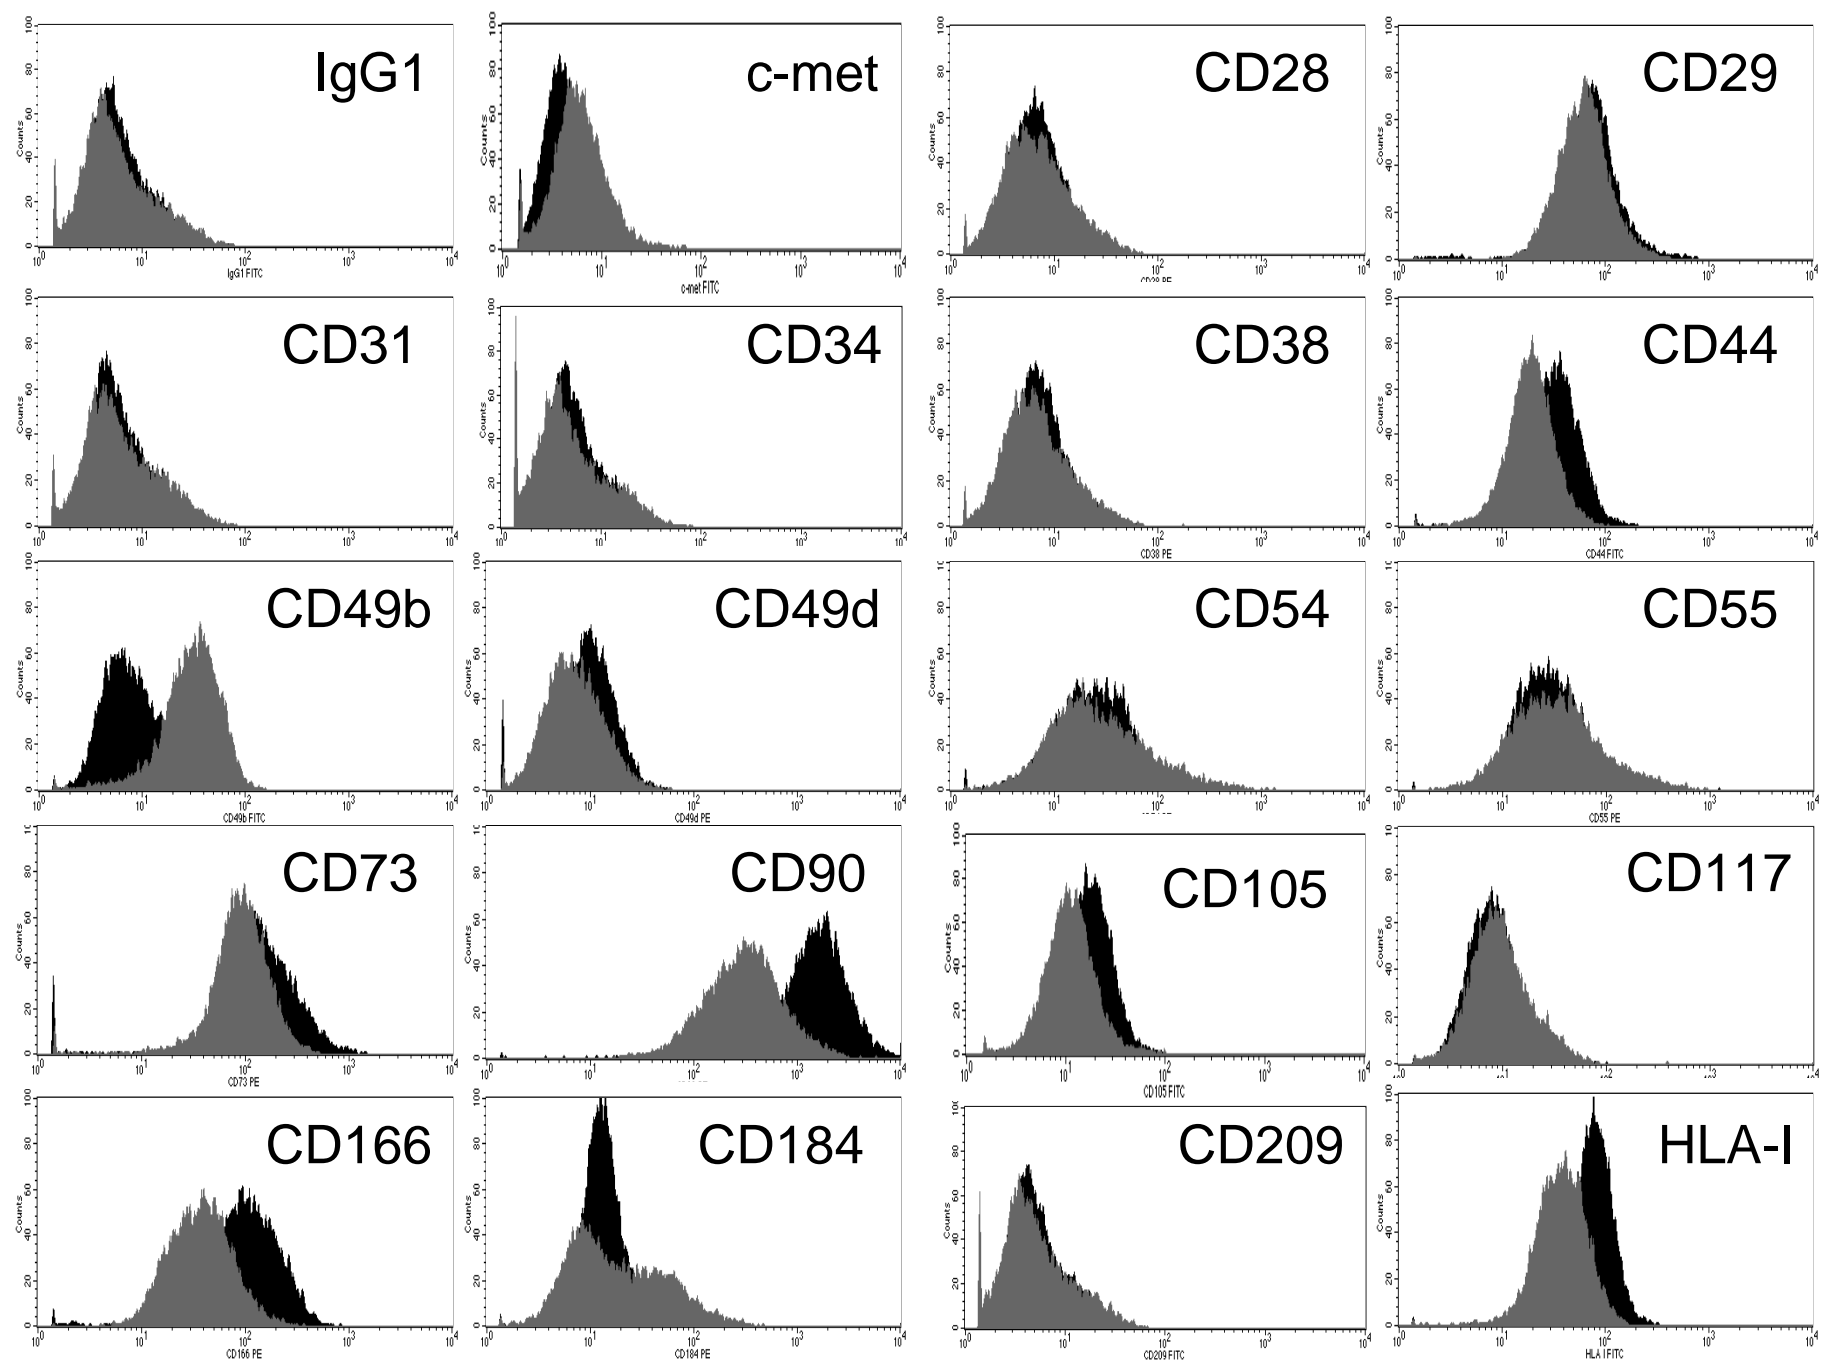

Fluorescence Intensity

Fig. S3

Fluorescence Intensity

Isotype control

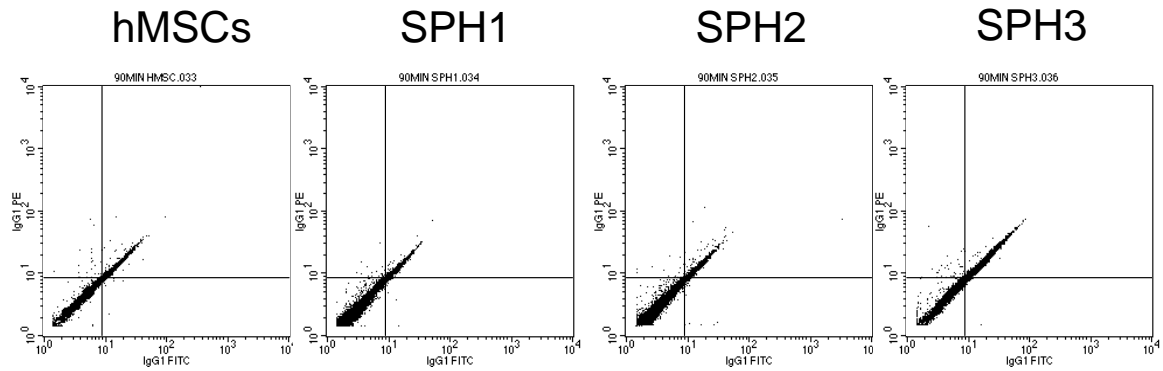

Isotype control

CD184 PE

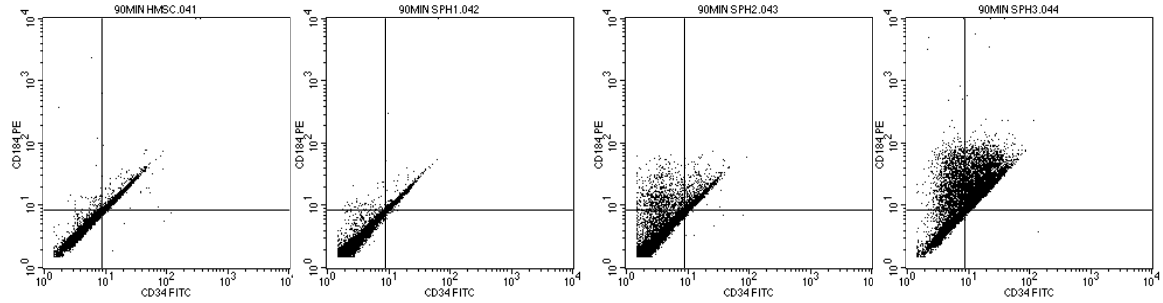

CD34 FITC

CD49d PE

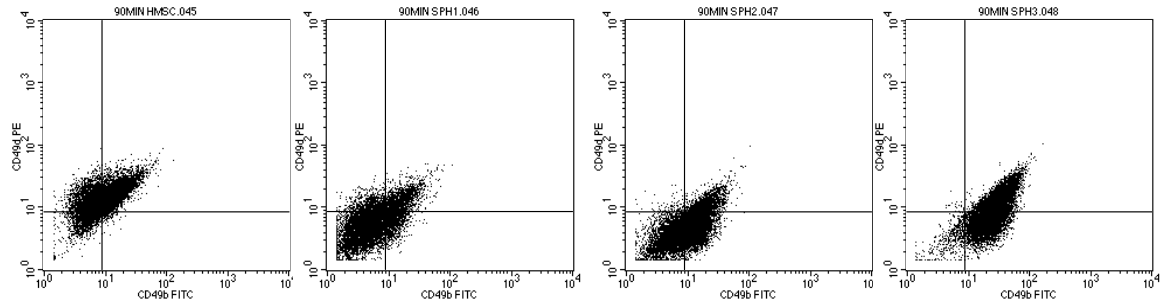

CD49b FITC

Fluorescence Intensity
